# Supplementary material for: Prevalence of atrial fibrillation and cardiovascular risk factors in a 63–65 years old general population cohort: the Akershus Cardiac Examination (ACE) 1950 Study
Source: PubMed Central journal article supplement — BMJ Open. 2018 Aug 1;8(7):e021704. doi: 10.1136/bmjopen-2018-021704 (PMC6074624; doi:10.1136/bmjopen-2018-021704), 2018-08-01
Supplement: bmjopen-2018-021704supp001.pdf [file bmjopen-2018-021704supp001.pdf]

**Supplementary Table 1: Questions used for self-reporting of physical activity and calculation of PAI (Physical Activity Index)**

| <b>Physical activity<sup>1</sup></b>                                                                                                                                                                                                                                                                                                                                                                    |
|---------------------------------------------------------------------------------------------------------------------------------------------------------------------------------------------------------------------------------------------------------------------------------------------------------------------------------------------------------------------------------------------------------|
| <p><b>Frequency</b><br/>How frequently do you exercise? Give an average (by exercise we mean, for example, going for walks, skiing, swimming or training/sport).</p> <ul style="list-style-type: none"><li>• Never [0]</li><li>• Less than once a week [0]</li><li>• Once a week [1]</li><li>• 2-3 times per week [2.5]</li><li>• Almost every day [5]</li></ul>                                        |
| <p><b>Intensity</b><br/>If you do such exercise as frequently as once or more times a week: How hard do you push yourself? (Give an average)</p> <ul style="list-style-type: none"><li>• I take it easy without breaking into a sweat or losing my breath [1]</li><li>• I push myself so hard that I lose my breath and break into a sweat [2]</li><li>• I push myself to near-exhaustion [3]</li></ul> |
| <p><b>Duration</b><br/>How long does each session last? (Give an average)</p> <ul style="list-style-type: none"><li>• Less than 15 minutes [0.1]</li><li>• 16-30 minutes [0.38]</li><li>• 30 minutes to 1 hour [0.75]</li><li>• More than 1 hour [1]</li></ul>                                                                                                                                          |
| <p>The response to each question (numbers in clams) was multiplied to calculate a Physical Activity Index (PAI), and this index was used for categorization into four groups:</p> <ul style="list-style-type: none"><li>• Inactive [0]</li><li>• Low PA [0.05-1.50]</li><li>• Medium PA [1.51-3.75]</li><li>• High PA [3.76-15.00]</li></ul>                                                            |

<sup>1</sup> This 3-item self-reported assessment of physical activity and consequent 4-level Physical Activity Index has been validated in the Norwegian HUNT study (*Nord-Trøndelag health study*), and shown moderate but significant correlation to both measured  $VO_{2max}$  and to the *International Physical Activity Questionnaire*.

Reference:

Aspenes ST, Nauman J, Nilsen TI, et al. Physical activity as a long-term predictor of peak oxygen uptake: the HUNT Study. *Med Sci Sports Exerc* 2011;43(9):1675-9.

**Supplementary Table 2: Additional sensitivity analysis for risk factors associated with atrial fibrillation**

'Original model' as depicted in Table 4 of the manuscript. The 'complete model' is an additional analysis including all candidate variables in the same model.

|                                        | Univariate OR<br>(95% CI)  | <i>p</i>         | Multivariate OR<br>(95% CI)<br>'Original model' | <i>p</i>         | Multivariate OR<br>(95% CI)<br>'Complete model' | <i>p</i>         |
|----------------------------------------|----------------------------|------------------|-------------------------------------------------|------------------|-------------------------------------------------|------------------|
| Male sex                               | 2.73 (1.92 – 3.87)         | <0.001           | 1.00 (0.59 – 1.68)                              | 0.99             | 1.03 (0.61 – 1.74)                              | 0.92             |
| <b>Height per 10 cm</b>                | <b>1.90 (1.59 – 2.28)</b>  | <b>&lt;0.001</b> | <b>1.67 (1.26 – 2.22)</b>                       | <b>&lt;0.001</b> | <b>1.62 (1.21 – 2.16)</b>                       | <b>0.001</b>     |
| <b>Weight per 10 kg</b>                | <b>1.42 (1.29 – 1.55)</b>  | <b>&lt;0.001</b> | <b>1.15 (1.01 – 1.30)</b>                       | <b>0.03</b>      | <b>1.16 (1.02 – 1.32)</b>                       | <b>0.02</b>      |
| <b>Hypertension</b>                    | <b>3.27 (2.15 – 4.97)</b>  | <b>&lt;0.001</b> | <b>2.49 (1.61 – 3.86)</b>                       | <b>&lt;0.001</b> | <b>2.47 (1.59 – 3.83)</b>                       | <b>&lt;0.001</b> |
| <b>Heart failure</b>                   | <b>8.53 (4.71 – 15.48)</b> | <b>&lt;0.001</b> | <b>3.51 (1.71 – 7.24)</b>                       | <b>0.001</b>     | <b>3.37 (1.61 – 7.08)</b>                       | <b>0.001</b>     |
| <b>Familial AF</b>                     | <b>2.16 (1.55 – 3.02)</b>  | <b>&lt;0.001</b> | <b>2.32 (1.63 – 3.31)</b>                       | <b>&lt;0.001</b> | <b>2.35 (1.64 – 3.35)</b>                       | <b>&lt;0.001</b> |
| <b>Reduced eGFR</b>                    | <b>2.87 (1.66 – 4.95)</b>  | <b>&lt;0.001</b> | <b>2.56 (1.42 – 4.60)</b>                       | <b>&lt;0.01</b>  | <b>2.43 (1.33 – 4.43)</b>                       | <b>&lt;0.01</b>  |
| Coronary heart disease                 | 2.88 (1.88 – 4.41)         | <0.001           | 1.56 (0.95 – 2.57)                              | 0.08             | 1.60 (0.96 – 2.66)                              | 0.07             |
| History of stroke/TIA                  | 2.09 (1.13 – 3.86)         | 0.02             | 1.43 (0.74 – 2.78)                              | 0.29             | 1.49 (0.77 – 2.90)                              | 0.24             |
| OSA                                    | 1.94 (1.17 – 3.23)         | 0.01             | 1.11 (0.63 – 1.97)                              | 0.71             | 1.07 (0.60 – 1.92)                              | 0.82             |
| Physical activity (low/normal as ref.) |                            |                  |                                                 |                  |                                                 |                  |
| Inactive                               | 1.61 (1.10 – 2.37)         | 0.02             | 1.38 (0.92 – 2.07)                              | 0.12             | 1.39 (0.92 – 2.11)                              | 0.12             |
| High level                             | 1.30 (0.88 – 1.94)         | 0.19             | 1.20 (0.80 – 1.81)                              | 0.38             | 1.20 (0.79 – 1.81)                              | 0.39             |
| Diabetes                               | 1.24 (0.74 – 2.08)         | 0.41             | -                                               | -                | 0.68 (0.39 – 1.20)                              | 0.19             |
| Daily smoking                          | 0.72 (0.44 – 1.19)         | 0.20             | -                                               | -                | 0.94 (0.55 – 1.59)                              | 0.81             |
| High alcohol consumption               | 0.81 (0.45 – 2.78)         | 0.81             | -                                               | -                | 0.87 (0.34 – 2.24)                              | 0.78             |

Variables with  $p < 0.20$  in univariate logistic regression analysis were included in the original multivariate analysis ('original model'). Bold font indicates a significant association in multivariate analysis. Hypertension: Mean systolic blood pressure  $\geq 140$  mmHg, or mean diastolic blood pressure  $\geq 90$  mmHg, or current use of any antihypertensive medication. TIA: Transient ischemic attack. Familial AF: Self-report of at least one 1<sup>st</sup> degree relative with known AF. OSA: Obstructive sleep apnoea. Physical activity (PA) level: Inactive and high level of PA compared to low/medium PA (combined to one group) as the reference group. High alcohol consumption: >14 standard drinks/week (both sexes).

**Supplementary Table 3: Stroke risk and use of medication in individuals with atrial fibrillation**

|                                                                         | <b>Total AF<br/>(n=165)</b> | <b>Men<br/>with AF<br/>(n=121)</b> | <b>Women<br/>with AF<br/>(n=44)</b> | <b><i>p</i></b> |
|-------------------------------------------------------------------------|-----------------------------|------------------------------------|-------------------------------------|-----------------|
| CHA <sub>2</sub> DS <sub>2</sub> -VASc score, mean ±SD                  | 1.7 ±1.1                    | 1.4 ±1.0                           | 2.2 ±0.9                            | <0.001          |
| CHA <sub>2</sub> DS <sub>2</sub> -VASc score, median [IQR; total range] | 2 [1-2; 0-6]                | 1 [1-2; 0-5]                       | 2 [2-2; 1-6]                        | <0.001          |
| CHA <sub>2</sub> DS <sub>2</sub> -VASc ≥2 (men) or ≥3 (women) (%)       | 52 (31.5)                   | 45 (37.2)                          | 7 (15.9)                            | <0.01           |
| Elevated blood pressure, (%)                                            | 67 (41.1)                   | 46 (38.7)                          | 21 (47.7)                           | 0.30            |
| Anticoagulation, (%)                                                    | 77 (46.7)                   | 56 (46.3)                          | 21 (47.7)                           | 0.87            |
| Platelet inhibitors, (%)                                                | 46 (27.9)                   | 38 (31.4)                          | 8 (18.2)                            | 0.09            |
| Beta-blockers, (%)                                                      | 97 (58.8)                   | 69 (57.0)                          | 28 (63.6)                           | 0.45            |
| Calcium antagonists, (%)                                                | 25 (15.2)                   | 20 (16.5)                          | 5 (11.4)                            | 0.41            |
| Antiarrhythmic drugs, (%)                                               | 28 (17.0)                   | 22 (18.2)                          | 6 (13.6)                            | 0.49            |
| Class Ic, (%)                                                           | 19 (11.5)                   | 14 (11.6)                          | 5 (11.4)                            | 0.97            |
| Class III, (%)                                                          | 9 (5.5)                     | 8 (6.6)                            | 1 (2.3)                             | 0.45            |
| Digoxin, (%)                                                            | 4 (2.4%)                    | 3 (2.5)                            | 1 (2.3)                             | 1.00            |
| ACE inhibitors or ATII antagonists, (%)                                 | 63 (38.2)                   | 51 (42.1)                          | 12 (27.3)                           | 0.08            |
| Statins, (%)                                                            | 63 (38.2)                   | 51 (42.1)                          | 12 (27.3)                           | 0.08            |
| Thyroid hormone therapy, (%)                                            | 7 (4.2)                     | 1 (0.8)                            | 6 (13.6)                            | <0.01           |

Categorical variables are reported as counts with percentages in parentheses. Continuous variables are reported as mean ±SD. P-values indicate difference between sexes. CHA<sub>2</sub>DS<sub>2</sub>-VASc score reported both as mean ±SD and median, including range. IQR: Inter-quartile range. Elevated blood pressure: ≥140 mmHg (systolic) or ≥90 mmHg diastolic regardless of treatment. ACE: Angiotensin converting enzyme. ATII: Angiotensin type 2.

**Supplementary Table 4: Stroke risk and comorbidity in screen-detected AF**

|                                                                    | <b>New AF<br/>at screening<br/>(n=12)</b> |
|--------------------------------------------------------------------|-------------------------------------------|
| Male sex, (%)                                                      | 11 (91.7)                                 |
| CHA <sub>2</sub> DS <sub>2</sub> -VASc score, mean $\pm$ SD        | 1.1 $\pm$ 0.8                             |
| CHA <sub>2</sub> DS <sub>2</sub> -VASc score, median [total range] | 1 [0-2]                                   |
| CHA <sub>2</sub> DS <sub>2</sub> -VASc 0, (%)                      | 3 (25.0)                                  |
| CHA <sub>2</sub> DS <sub>2</sub> -VASc 1, (%)                      | 5 (41.7)                                  |
| CHA <sub>2</sub> DS <sub>2</sub> -VASc 2, (%)                      | 4 (33.3)                                  |
| Overweight, (%)                                                    | 9 (75.0)                                  |
| Hypertension, (%)                                                  | 8 (66.7)                                  |
| Elevated blood pressure, (%)                                       | 5 (41.7)                                  |
| Heart failure, (%)                                                 | 0 (0)                                     |
| Diabetes, (%)                                                      | 2 (16.7)                                  |
| History of stroke, (%)                                             | 0 (0)                                     |
| Myocardial infarction, (%)                                         | 1 (8.3)                                   |
| Reduced eGFR, (%)                                                  | 0 (0)                                     |
| Obstructive sleep apnoea, (%)                                      | 1 (8.3)                                   |
| Daily smoking, (%)                                                 | 0 (0)                                     |

Categorical variables are reported as counts with percentages in parentheses. CHA<sub>2</sub>DS<sub>2</sub>-VASc score is reported both as mean  $\pm$ SD and median. Hypertension: Mean systolic blood pressure  $\geq$ 140 mmHg, or mean diastolic blood pressure  $\geq$ 90 mmHg, or current use of any antihypertensive medication. Elevated blood pressure:  $\geq$ 140 mmHg (systolic) or  $\geq$ 90 mmHg diastolic regardless of treatment. TIA: Transient ischemic attack.
